# Supplementary material
Source: PubMed Central journal article supplement (PMC9466654)
Supplement: NIHMS1826732-supplement-Supp1.pdf [file NIHMS1826732-supplement-Supp1.pdf]

## Supplementary File 1

### Search Strategy

The rapid review was conducted in PubMed. The following search strategy was used:

```
("systems thinking"[All Fields] OR "systems science"[All Fields] OR "causal loop"[All Fields] OR "system dynamics"[All Fields] OR "network analysis"[All Fields] OR "systems dynamics"[All Fields] OR "models, organizational"[MeSH Terms]) AND (tobacco[tw] OR ("tobacco"[MeSH Terms] OR "tobacco"[All Fields] OR "tobacco products"[MeSH Terms] OR ("tobacco"[All Fields] AND "products"[All Fields]) OR "tobacco products"[All Fields]) AND "control groups"[MeSH Terms]) OR smoking[ti] OR smoker[ti] OR smokers[ti]) AND ("2000/01/01"[PDAT] : "3000/12/31"[PDAT])
```
